# Supplementary material for: Enrichment and Source Apportionment of Potentially Toxic Elements in Human Scalp Hair from the “Tin Capital” Gejiu and Surrounding Cities, China
Source: Research Square preprint supplement (doi:10.21203/rs.3.rs-6926705/v1), 2025-07-14
Supplement: Supplementary file 1 [file 523e3ac115398abbac4e22bf.docx]

**Enrichment and Source Apportionment of Potentially Toxic Elements in Human Hair from the “Tin Capital” Gejiu and Surrounding Cities, China**

**Shuran Yanga,b* , Qianrui Huanga,b，Qinhui Huanga,b，Xianfeng Chenga,b，Zailing Chena,b，Yu Chenc,d**

aYunnan Land and Resources Vocational College, Kunming 652501, Yangzonghai Scenic Area, Yunnan Province, China

bEngineering Center of Yunnan Education Department for Health Geological Survey & Evaluation

cInternational Research Center of Big Data for Sustainable Development Goals, Beijing 100094, China
dKey Laboratory of Digital Earth Science, Aerospace Information Research Institute, Chinese Academy of Sciences, Beijing 100094, China

*****Corresponding author E-mail:[yangshuran1988@foxmail.com](mailto:yangshuran1988@foxmail.com)

**Abstract**：This study investigated seven potentially toxic elements (PTEs) (Cd, Cr, As, Hg, Cu, Pb, and Zn) in human scalp hair (n=100) from random residents near a renowned polymetallic mining area in southwest China. Concentrations ranged from 0.002–0.610 μg/g (Cd), 0.000–0.558 (Cr), 0.050–5.490 (As), 0.071–2.750 (Hg), 3.150–27.200 (Cu), 0.000–804.000 (Pb), and 78.700–1360.000 (Zn). Levels of As, Hg, Pb, and Zn were generally elevated compared to international reference values and typical mining sites. Statistical analysis showed no significant overall influence of age or gender on PTEs levels. However, Hg tended to accumulate in the elderly, while Pb was higher in children. Females had significantly higher Cd and Zn levels. Spearman correlations revealed strong positive associations between Cd–Pb and Pb–As in both sexes, and negative correlations between Zn–As and Zn–Pb in females, suggesting common sources and possible antagonistic interactions. Principal component analysis (KMO = 0.578; total variance explained = 67.37%) identified three main sources: PC1 (Cd, Pb, As) attributed to mining and smelting; PC2 (Hg) to coal combustion; and PC3 (Zn, Cu) to endogenous factors. Cr originated from mixed industrial and personal sources. Multiple linear regression showed that industrial output accounted for 26.3% of PTE variation, with Cd (B = 0.043) and Pb (B = 0.102) positively, and Hg (B = –0.019) negatively correlated with production levels. These findings highlight complex, multisource PTEs exposure in study area, offering scientific evidence for environmental management and public health policy.

**Keywords**: Potential toxic elements; human hair; age; gender; Gejiu polymetallic deposit

**Table S1** The limits of detection of PTEs

|  | As | Cd | Cr | Pb | Hg | Cu | Zn |
| --- | --- | --- | --- | --- | --- | --- | --- |
| LOD | 0.004 | 0.001 | 0.001 | 0.002 | 0.004 | 0.01 | 0.2 |

**Table S2** Descriptive statistics of PTEs in hair by age from GJPD (μg/g)

|  | Age | Cd | Cr | As | Hg | Cu | Pb | Zn |
| --- | --- | --- | --- | --- | --- | --- | --- | --- |
| Min-Max | 4-18  (n=26) | 0.002-0.353 | 0.000-  0.558 | 0.000-  5.110 | 0.087-  9.480 | 5.250-  27.20 | 0.000-  33.40 | 102.0-  555.0 |
| 19-50  (n=41） | 0.003-  0.386 | 0.000-  0.423 | 0.000-  4.100 | 0.071-  3.580 | 4.290-  22.90 | 0.066-  14.50 | 89.20-  1240 |
| 51-81  (n-32) | 0.003-  0.203 | 0.000-  0.466 | 0.000-  5.490 | 0.110  6.520 | 3.150-  15.70 | 0.115  3.970 | 78.70-  1360 |
| Average ±SD | 4-18  (n=26) | 0.054±0.078 | 0.070±0.136 | 0.752±1.301 | 0.834±1.975 | 8.951±5.418 | 2.299±6.548 | 201.4±100.5 |
| 19-50  (n=41） | 0.059±  0.082 | 0.052±  0.116 | 0.826±  1.012 | 0.735±  0.932 | 9.150±  3.930 | 1.433±  2.359 | 267.8±  231.5 |
| 51-81  (n-32) | 0.056±  0.061 | 0.051±  0.113 | 0.650±  1.043 | 1.285±  1.597 | 7.401±  2.383 | 1.083±  1.163 | 236.6±  231.2 |
| Median | 4-18  (n=26) | 0.026 | 0.000 | 0.236 | 0.221 | 7.220 | 0.427 | 174.0 |
| 19-50  (n=41） | 0.041 | 0.000 | 0.410 | 0.321 | 8.060 | 0.634 | 203.0 |
| 51-81  (n-32) | 0.028 | 0.000 | 0.407 | 0.717 | 6.795 | 0.530 | 177.0 |
| Copper mine (Pereira et al., 2004) | Children | 1.183±0.056 | 0.950±0.523 | 0.245±0.044 | - | 10.83±1.306 | - | 0.132±0.019 |
| Adults | 0.891±0.355 | 0.883±0.193 | 0.834±0.202 | - | 27.19±11.49 | - | 0.410±0.117 |
| Rare earth ore mining (Dai et al., 2023) | Children | 0.481 ± 0.437 | 0.851 ± 0.445 | - | - | 5.309 ± 4.488 | 2.762 ± 2.737 | 162.7± 57.37 |
| Adults | 0.608 ± 0.526 | 0.833 ± 0.853 | - | - | 7.787 ± 4.418 | 3.204 ± 2.699 | 167.9 ± 99.92 |
| Nonferrous Metal Mine (Zheng et al., 2025) | Children | 0.15 | 3.86 | .26 | 0.06 | 8.7 | 5.41 | 103.57 |
| Adults | 0.24 | 5.53 | 0.29 | 0.07 | 9.32 | 12.01 | 111.75 |

**Table S3** Descriptive statistics of PTEs in hair by sex from GJPD (μg/g)

|  | Sex | Cd | Cr | As | Hg | Cu | Pb | Zn |
| --- | --- | --- | --- | --- | --- | --- | --- | --- |
| Min-Max | Female（N=41） | 0.004-  0.386 | 0.000-  0.423 | 0.000-  3.440 | 0.087-  6.520 | 3.150-  18.00 | 0.115-  14.50 | 78.70-  1360 |
| Male（N=59） | 0.002-  0.353 | 0.000-  0.558 | 0.007-  5.490 | 0.071-  9.480 | 4.800-  27.20 | 0.000-  33.40 | 79.00-  555.0 |
| Mean ±SD | Female（N=41） | 0.074±  0.090 | 0.068±  0.130 | 0.564±  0.669 | 0.682±  1.104 | 8.703±  3.224 | 1.655±  2.411 | 328.8±  285.1 |
| Male（N=59） | 0.045-  0.059 | 0.049-  0.112 | 0.876-  1.298 | 1.114-  1.687 | 8.417-  4.513 | 1.475-  4.416 | 180.2-  84.92 |
| Median | Female（N=41） | 0.039 | 0.000 | 0.407 | 0.327 | 8.085 | 0.797 | 220.0 |
| Male（N=59） | 0.025 | 0.000 | 0.252 | 0.321 | 6.920 | 0.436 | 170.0 |
| polymetallic rare earth ore mining (Dai et al., 2023) | Female | 0.614 ± 0.551 | 0.882 ± 0.843 |  |  | 7.144 ± 4.141 | 3.064 ± 2.776 | 167.920 ± 87.451 |
| Male | 0.542 ± 0.463 | 0.792 ±0.707 |  |  | 7.257 ± 4.945 | 3.136 ± 2.652 | 165.563 ± 96.198 |
| Nonferrous Metal Mining (Zheng et al., 2025) | Female | 0.090 | 4.820 | 0.100 | 0.060 | 9.070 | 4.430 | 139.22 |
| Male | 0.250 | 5.230 | 0.320 | 0.070 | 9.220 | 11.96 | 104.02 |

Table S4 Descriptive statistics of PTEs in hair by location from GJPD (μg/g)

|  | location | Cd | Cr | As | Hg | Cu | Pb | Zn |
| --- | --- | --- | --- | --- | --- | --- | --- | --- |
| Min-Max | GJ  (N=30) | 0.004-  0.386 | 0.000-  0.558 | 0.020-  5.110 | 0.100-  2.750 | 3.150-  27.20 | 0.000-  33.40 | 106.0-  1360 |
| KY  (N=29) | 0.009-  0.159 | 0.000-  0.000 | 0.074-  5.490 | 0.350-  9.480 | 4.290-  22.90 | 0.115-  0.790 | 78.70-  1060 |
| MZ  (N=41) | 0.002-  0.186 | 0.000-  0.409 | 0.000-  1.010 | 0.071-  2.710 | 5.250-  26.40 | 0.066-  7.130 | 89.20-  513.0 |
| Mean±SD | GJ  (N=30) | 0.108±  0.107 | 0.069±  0.162 | 1.084±  1.255 | 0.397±  0.569 | 9.670±  4.593 | 3.044±  6.427 | 346.1±  296.1 |
| KY  (N=29) | 0.040±  0.035 | 0.000±  0.000 | 1.221±  1.318 | 2.329±  2.076 | 7.993±  4.034 | 0.329±  0.159 | 180.9±  175.7 |
| MZ  (N=41) | 0.032±  0.043 | 0.088±  0.116 | 0.181±  0.210 | 0.339±  0.450 | 8.110±  3.497 | 1.351±  1.515 | 207.4±  90.06 |
| Median | GJ  (N=30) | 0.069 | 0.000 | 0.595 | 0.247 | 8.220 | 1.120 | 215.0 |
| KY  (N=29) | 0.026 | 0.000 | 0.724 | 1.610 | 6.710 | 0.310 | 141.0 |
| MZ  (N=41) | 0.016 | 0.037 | 0.111 | 0.228 | 7.070 | 0.581 | 181.0 |

**Table S5.** Matrix of rotated component for human hair PTEs in GJPD

| PTEs | PC1 Loadings | PC2 Loadings | PC3 Loadings |
| --- | --- | --- | --- |
| Cd | 0.87 | 0.13 | -0.10 |
| Cr | 0.23 | 0.51 | 0.42 |
| As | 0.71 | -0.45 | -0.17 |
| Pb | 0.80 | 0.24 | -0.19 |
| Hg | 0.26 | -0.81 | 0.02 |
| Cu | 0.44 | 0.13 | 0.66 |
| Zn | 0.08 | 0.52 | -0.58 |
| % of Variance | 31.62 | 21.20 | 14.55 |
| Cumulative | 31.62% | 52.82% | 67.37% |

**Table S6** The GDP of each industry in GJ, MZ, and KY in 2020

| GDP (billion CNY) | Gejiu(GJ) | Mengzi(MZ) | Kaiyuan(KY) |
| --- | --- | --- | --- |
| Agriculture | 24.2 | 62.3 | 47.04 |
| Industry | 650.15 | 430.63 | 151.99 |
| Construction | 112.33 | 102.59 | 90.84 |
| Transportation | 44.42 | 81.57 | 144.43 |
